# Supplementary material for: Plant Regeneration via Organogenesis in Jerusalem Artichokes and Comparative Analysis of Endogenous Hormones and Antioxidant Enzymes in Typical and Atypical Shoots
Source: MDPI journal article supplement (doi:10.3390/plants12223789), 2023-11-07
Supplement: s1 [file s1]

### Supplemental Table

**Table S1.** List of primer sequences used for SSR analysis in this study. These primers were designed by Yang et al. (2018) based on the transcriptome sequences of Jerusalem artichoke (*Helianthus tuberosus*)

| Marker name | Motif | No. of repeats | Forward primer       | Reverse primer          | Annealing temperature (°C) |
|-------------|-------|----------------|----------------------|-------------------------|----------------------------|
| JS4         | AT    | 6              | ACATATCCACCACCAACCGT | CCACTTCGCCAGTGGTTAGT    | 57.0                       |
| JS5         | GAT   | 6              | CTGCTGCAGATGATGATGGT | GATCCGATACAGGAAGCCAA    | 54.7                       |
| JS6         | GTG   | 5              | GGTGTGTGACTTGGTGGTTG | CTGCACACTGCACACCTTTT    | 56.6                       |
| JS7         | TGG   | 5              | ATTTCTTCATCATACGGCGG | CTACTTCATCCACCATCGCC    | 54.1                       |
| JS8         | GCAG  | 7              | GGGGCCAAAGTGTAATTTC  | GTTCGCATTTGACAATCCCT    | 53.6                       |
| JS10        | CCA   | 6              | TCAATCAACCCACACACACC | AGAAGGTGTTCCAGTCACGC    | 56.6                       |
| JS11        | GT    | 7              | TGAAATTGTGGTGGGGTTTT | CCCCCATAAACCTAGCTTC     | 53.8                       |
| JS13        | CT    | 6              | TTTACTGGTGGCTCCGTTTC | GGAGTGGAGAGGAGGAGGAG    | 57.3                       |
| JS18        | CAC   | 7              | AATTGGCGGAGTGTCAAGAG | TAAGGATGCACGCTGACTTG    | 55.2                       |
| JS19        | AGAT  | 4              | GGGCCACTTTTCTCTGAACA | TTAATGGTGGAATCAACCCAA   | 53.2                       |
| JS20        | CCA   | 8              | GAAGTTGGTTGCTTTTTCGG | TTTTCCCAATCAAACCTCAACTG | 51.5                       |
