# Supplementary material for: Plant Regeneration via Organogenesis in Jerusalem Artichokes and Comparative Analysis of Endogenous Hormones and Antioxidant Enzymes in Typical and Atypical Shoots
Source: MDPI journal article supplement (doi:10.3390/plants12223789), 2023-11-07
Supplement: s1 [file s1]

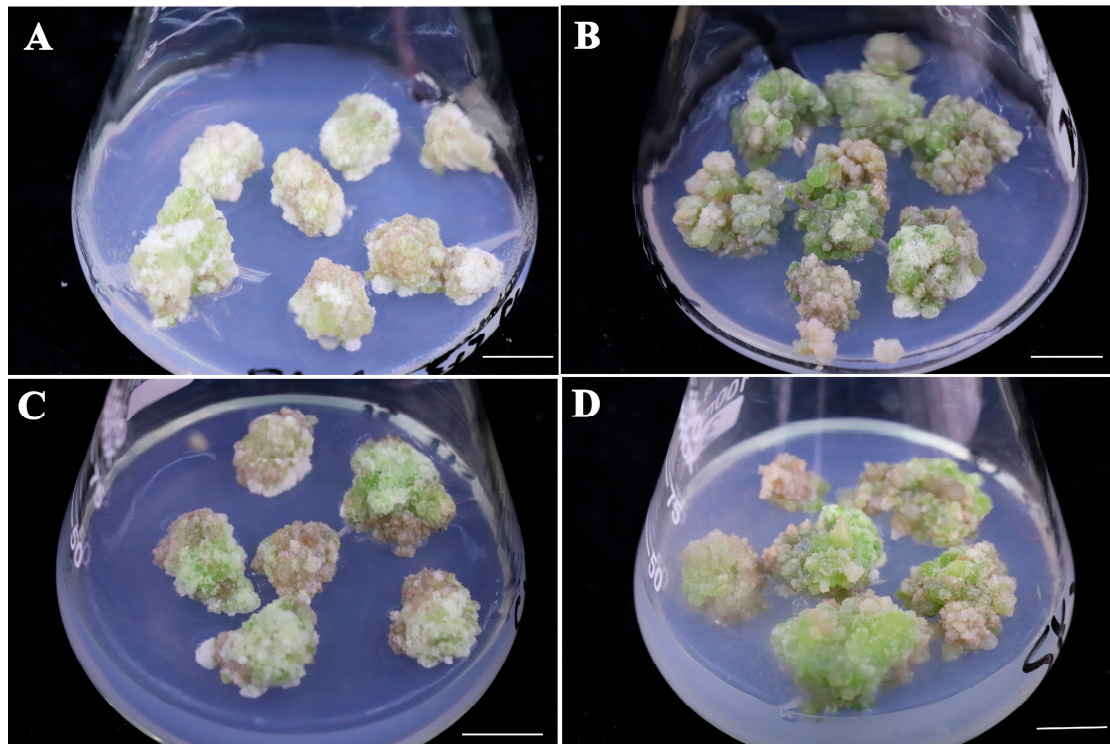

**Figure S1.** The stem-derived callus of Jerusalem artichoke cultured on MS basal media supplemented with 0.5 mg/L BA and 0.3 mg/L NAA (**A**), 0.5 mg/L BA and 0.6 mg/L NAA (**B**), 1.0 mg/L BA and 0.3 mg/L NAA (**C**) , and 1.0 mg/L BA and 0.6 mg/L NAA (**D**) after 60 days culture. Bars = 1 cm.
